# Supplementary material
Source: PubMed Central journal article supplement (PMC3748497)
Supplement: SD2.pdf [file SD2.pdf]

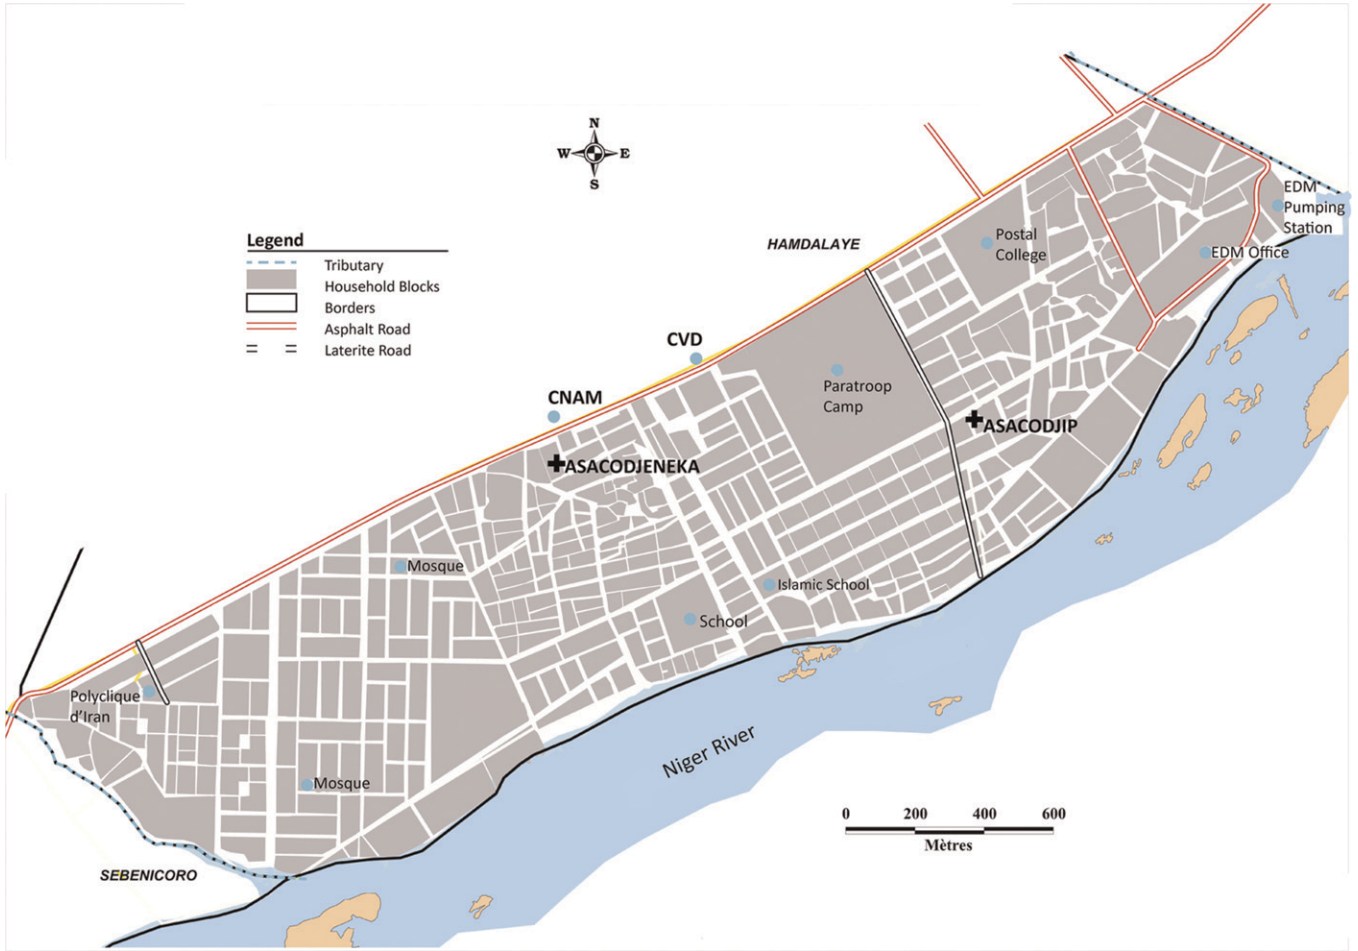

SUPPLEMENTAL FIGURE 1. Map of Djikoroni-para quartier, showing the Sentinel Health Centers (signified by cross) selected for the GEMS.

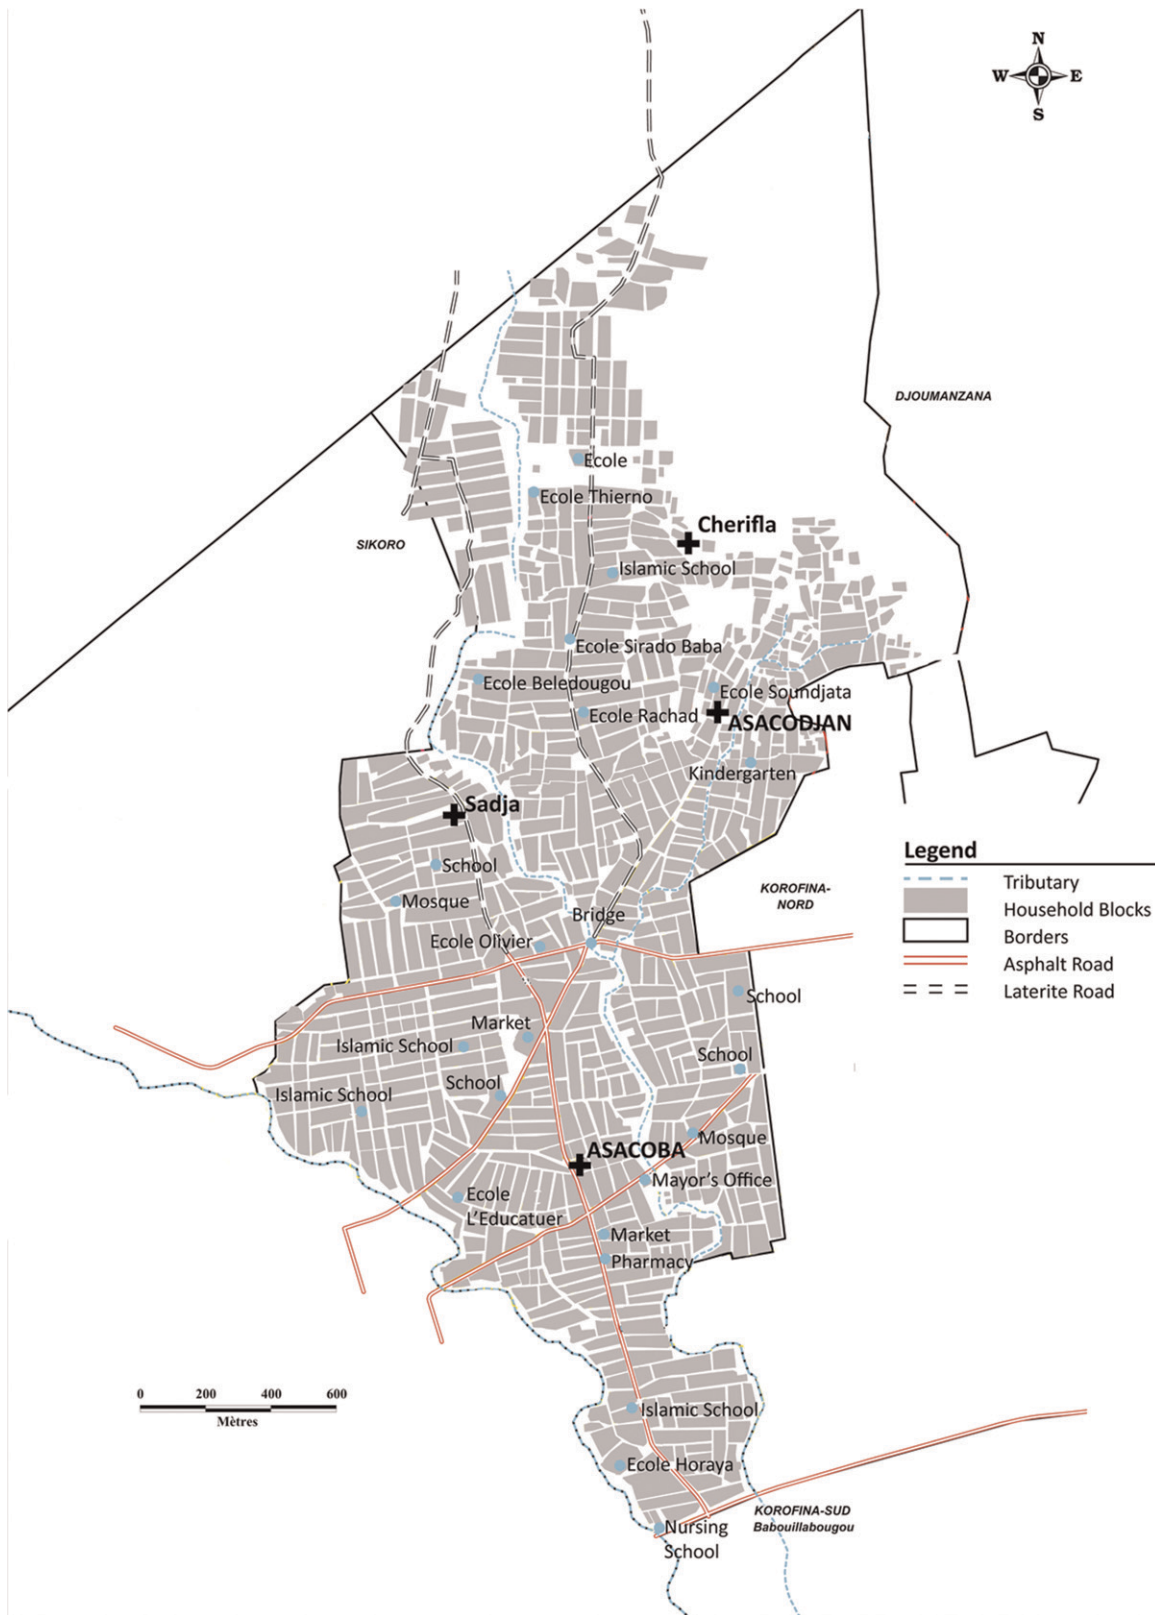

SUPPLEMENTAL FIGURE 2. Map of Banconi quartier, showing the Sentinel Health Centers (signified by cross) selected for the GEMS.

SUPPLEMENTAL TABLE 1

Perceived susceptibility associated with seeking care from a traditional healer among children < 5 years old with reported diarrheal illness within the previous 14 days (N = 96)

| Variable                                                                                       | Sought care with traditional healer |         | OR (95% CI)      |
|------------------------------------------------------------------------------------------------|-------------------------------------|---------|------------------|
|                                                                                                | n/N                                 | Percent |                  |
| Caretaker knows a child who died of the illness                                                |                                     |         |                  |
| Simple loose/watery diarrhea                                                                   |                                     |         |                  |
| Yes                                                                                            | 21/42                               | 51      | 0.66 (0.27–1.59) |
| No                                                                                             | 32/54                               | 61      | 0.66 (0.27–1.59) |
| Rice/watery/cholera-like illness                                                               |                                     |         |                  |
| Yes                                                                                            | 40/73                               | 55      | 0.78 (0.28–2.18) |
| No                                                                                             | 13/23                               | 61      | 0.78 (0.28–2.18) |
| Bloody diarrhea                                                                                |                                     |         |                  |
| Yes                                                                                            | 34/61                               | 59      | 1.25 (0.50–3.11) |
| No                                                                                             | 19/35                               | 53      | 1.25 (0.50–3.11) |
| Caretaker knows ways that prevent children from getting any of the following types of diarrhea |                                     |         |                  |
| Simple loose/watery                                                                            |                                     |         |                  |
| Yes                                                                                            | 25/46                               | 56      | 0.94 (0.39–2.26) |
| No                                                                                             | 28/50                               | 58      | 0.94 (0.39–2.26) |
| Bloody                                                                                         |                                     |         |                  |
| Yes                                                                                            | 23/44                               | 54      | 0.82 (0.34–1.98) |
| No                                                                                             | 30/52                               | 60      | 0.82 (0.34–1.98) |
| Rice/watery/cholera-like illness                                                               |                                     |         |                  |
| Yes                                                                                            | 29/49                               | 54      | 0.81 (0.34–1.96) |
| No                                                                                             | 24/47                               | 59      | 0.81 (0.34–1.96) |
| Caretaker looks for these signs of dehydration                                                 |                                     |         |                  |
| Dry mouth                                                                                      |                                     |         |                  |
| Yes                                                                                            | 27/41                               | 67      | 2.20 (0.89–5.47) |
| No                                                                                             | 26/55                               | 48      | 2.20 (0.89–5.47) |
| Decreased urination                                                                            |                                     |         |                  |
| Yes                                                                                            | 11/21                               | 58      | 1.07 (0.38–3.06) |
| No                                                                                             | 42/75                               | 57      | 1.07 (0.38–3.06) |
| Sunken eyes                                                                                    |                                     |         |                  |
| Yes                                                                                            | 29/48                               | 62      | 1.46 (0.60–3.52) |
| No                                                                                             | 24/48                               | 52      | 1.46 (0.60–3.52) |
| Wrinkled skin                                                                                  |                                     |         |                  |
| Yes                                                                                            | 16/32                               | 54      | 0.85 (0.33–2.16) |
| No                                                                                             | 37/64                               | 58      | 0.85 (0.33–2.16) |
| Lethargy                                                                                       |                                     |         |                  |
| Yes                                                                                            | 29/48                               | 65      | 1.95 (0.80–4.71) |
| No                                                                                             | 24/48                               | 49      | 1.95 (0.80–4.71) |
| Coma/loss of consciousness                                                                     |                                     |         |                  |
| Yes                                                                                            | 9/12                                | 85      | 5.16 (1.24–1.49) |
| No                                                                                             | 44/84                               | 53      | 5.16 (1.24–1.49) |
| Thirsty                                                                                        |                                     |         |                  |
| Yes                                                                                            | 31/48                               | 67      | 2.31 (0.94–5.67) |
| No                                                                                             | 22/48                               | 47      | 2.31 (0.94–5.67) |

SUPPLEMENTAL TABLE 2

Perceived severity associated with seeking care from a traditional healer among children < 5 years old with reported diarrheal illness within the previous 14 days ( $N = 96$ )

| Variable                                                                          | Sought care with traditional healer |         | OR (95% CI)      |
|-----------------------------------------------------------------------------------|-------------------------------------|---------|------------------|
|                                                                                   | <i>n/N</i>                          | Percent |                  |
| Caretaker believes that these types of diarrhea can lead to serious harm or death |                                     |         |                  |
| Mucus/pus in stool                                                                |                                     |         |                  |
| Yes                                                                               | 30/52                               | 62      | 1.63 (0.68–3.95) |
| No                                                                                | 23/44                               | 50      | 1.63 (0.68–3.95) |
| Rice/watery                                                                       |                                     |         |                  |
| Yes                                                                               | 39/69                               | 58      | 1.21 (0.46–3.18) |
| No                                                                                | 14/27                               | 54      | 1.21 (0.46–3.18) |
| Bloody                                                                            |                                     |         |                  |
| Yes                                                                               | 39/72                               | 55      | 0.71 (0.26–1.99) |
| No                                                                                | 14/24                               | 63      | 0.71 (0.26–1.99) |
| Large number of stools per day                                                    |                                     |         |                  |
| Yes                                                                               | 22/45                               | 50      | 0.61 (0.25–1.47) |
| No                                                                                | 31/51                               | 63      | 0.61 (0.25–1.47) |
| Fever with diarrhea                                                               |                                     |         |                  |
| Yes                                                                               | 30/54                               | 58      | 1.14 (0.47–2.76) |
| No                                                                                | 23/42                               | 55      | 1.14 (0.47–2.76) |
| Vomiting with diarrhea                                                            |                                     |         |                  |
| Yes                                                                               | 37/68                               | 58      | 1.10 (0.42–2.90) |
| No                                                                                | 16/28                               | 55      | 1.10 (0.42–2.90) |
| Dehydration                                                                       |                                     |         |                  |
| Yes                                                                               | 32/55                               | 62      | 1.69 (0.69–4.09) |
| No                                                                                | 21/41                               | 45      | 1.69 (0.69–4.09) |
| Maximum number of stools per day                                                  |                                     |         |                  |
| 3–6                                                                               | 46/79                               | 60      | 0.61 (0.17–2.27) |
| > 7                                                                               | 6/13                                | 48      | 0.61 (0.17–2.27) |
| Stool characteristics during diarrheal illness                                    |                                     |         |                  |
| Blood in stool                                                                    |                                     |         |                  |
| Yes                                                                               | 9/15                                | 61      | 1.22 (0.36–4.20) |
| No                                                                                | 44/81                               | 56      | 1.22 (0.36–4.20) |
| Mucus/pus in stool                                                                |                                     |         |                  |
| Yes                                                                               | 40/65                               | 64      | 2.48 (0.96–6.41) |
| No or do not know                                                                 | 13/31                               | 42      | 2.48 (0.96–6.41) |
| Rice/watery stool                                                                 |                                     |         |                  |
| Yes                                                                               | 10/18                               | 58      | 0.99 (0.32–3.07) |
| No                                                                                | 43/77                               | 58      | 0.99 (0.32–3.07) |
| Signs of dehydration                                                              |                                     |         |                  |
| Decreased urination                                                               |                                     |         |                  |
| Yes                                                                               | 24/33                               | 76      | 3.46 (1.27–9.42) |
| No                                                                                | 29/63                               | 48      | 3.46 (1.27–9.42) |
| Very thirsty                                                                      |                                     |         |                  |
| Yes                                                                               | 46/83                               | 57      | 1.35 (0.38–4.85) |
| No                                                                                | 6/12                                | 50      | 1.35 (0.38–4.85) |
| Dry mouth                                                                         |                                     |         |                  |
| Yes                                                                               | 26/42                               | 62      | 1.19 (0.47–3.00) |
| No                                                                                | 26/48                               | 58      | 1.19 (0.47–3.00) |
| Sunken eyes                                                                       |                                     |         |                  |
| Yes                                                                               | 31/56                               | 58      | 0.99 (0.40–2.42) |
| No                                                                                | 22/39                               | 58      | 0.99 (0.40–2.42) |
| Wrinkled skin                                                                     |                                     |         |                  |
| Yes                                                                               | 14/26                               | 53      | 0.79 (0.29–2.16) |
| No or do not know                                                                 | 39/70                               | 58      | 0.79 (0.29–2.16) |
| Signs of severe disease                                                           |                                     |         |                  |
| Fever                                                                             |                                     |         |                  |
| Yes                                                                               | 43/79                               | 56      | 0.81 (0.26–2.57) |
| No                                                                                | 10/17                               | 61      | 0.81 (0.26–2.57) |
| Vomiting                                                                          |                                     |         |                  |
| Yes                                                                               | 17/27                               | 72      | 2.38 (0.87–6.47) |
| No                                                                                | 36/69                               | 52      | 2.38 (0.87–6.47) |
| Lethargy                                                                          |                                     |         |                  |
| Yes                                                                               | 34/58                               | 63      | 1.79 (0.72–4.46) |
| No                                                                                | 17/35                               | 48      | 1.79 (0.72–4.46) |
| Coma/loss of consciousness                                                        |                                     |         |                  |
| Yes                                                                               | 2/4                                 | 50      | 0.76 (0.08–6.96) |
| No                                                                                | 49/89                               | 57      | 0.76 (0.08–6.96) |

SUPPLEMENTAL TABLE 3

Perceived benefits associated with seeking care from a traditional healer among children < 5 years old with reported diarrheal illness within the previous 14 days (*N* = 96)

| Variable                                                       | Sought care with traditional healer |         | OR (95% CI)      |
|----------------------------------------------------------------|-------------------------------------|---------|------------------|
|                                                                | <i>n/N</i>                          | Percent |                  |
| Caretaker thinks that there is a treatment that works best for |                                     |         |                  |
| Simple loose/watery diarrhea                                   |                                     |         |                  |
| Yes                                                            | 45/85                               | 55      | –                |
| No                                                             | 4/4                                 | 100     | –                |
| Bloody diarrhea                                                |                                     |         |                  |
| Yes                                                            | 45/84                               | 56      | 0.70 (0.06–7.83) |
| No                                                             | 3/4                                 | 65      | 0.70 (0.06–7.83) |
| Rice watery/cholera-like illness                               |                                     |         |                  |
| Yes                                                            | 44/84                               | 55      | 0.55 (0.05–5.60) |
| No                                                             | 4/5                                 | 69      | 0.55 (0.05–5.60) |
| Caretaker thinks ORS works well to treat diarrhea              |                                     |         |                  |
| Yes                                                            | 51/91                               | 58      | 1.37 (0.08–23.9) |
| No                                                             | 1/2                                 | 50      | 1.37 (0.08–23.9) |
| Caretaker thinks vaccines are important to their child         |                                     |         |                  |
| Yes                                                            | 53/96                               | 57      | –                |
| No                                                             | 0                                   | 43      | –                |

SUPPLEMENTAL TABLE 4

Perceived barriers associated with seeking care from a traditional healer among children < 5 years old with reported diarrheal illness within the previous 14 days (*N* = 96)

| Variable                                                      | Sought care with traditional healer |         | OR (95% CI)       |
|---------------------------------------------------------------|-------------------------------------|---------|-------------------|
|                                                               | <i>n/N</i>                          | Percent |                   |
| Caretaker thinks that the highest cost of medical care is for |                                     |         |                   |
| Simple loose/watery diarrhea                                  | 3/8                                 | 36      | –                 |
| Bloody diarrhea                                               | 23/45                               | 53      | 2.02 (0.36–11.31) |
| Rice watery/cholera-like illness or do not know               | 27/43                               | 64      | 3.09 (0.55–17.47) |

SUPPLEMENTAL TABLE 5

Other sociodemographic factors not fitting into the Health Belief Model framework associated with seeking care from a traditional healer among children < 5 years old with reported diarrheal illness within the previous 14 days (*N* = 96)

| Variable                                               | Sought care with traditional healer |         | OR (95% CI)      |
|--------------------------------------------------------|-------------------------------------|---------|------------------|
|                                                        | <i>n/N</i>                          | Percent |                  |
| Child's age group (months)                             |                                     |         |                  |
| 0–11                                                   | 21/35                               | 60      | 1.13 (0.37–3.45) |
| 12–23                                                  | 20/40                               | 50      | 0.75 (0.26–2.22) |
| 24–59                                                  | 12/21                               | 57      | –                |
| Age (months)                                           | –                                   | –       | –                |
| Child sex                                              |                                     |         |                  |
| Male                                                   | 25/51                               | 50      | 1.87 (0.77–4.56) |
| Female                                                 | 28/45                               | 65      | 1.87 (0.77–4.56) |
| Children < 60 months old living in the household       | –                                   | –       | 0.94 (0.80–1.12) |
| Child's household wealth ranking quintiles             |                                     |         |                  |
| First                                                  | 14/22                               | 66      | 2.21 (0.56–8.65) |
| Second                                                 | 10/17                               | 55      | 1.39 (0.32–8.66) |
| Third                                                  | 14/25                               | 58      | 1.54 (0.41–5.76) |
| Fourth                                                 | 7/14                                | 53      | 1.29 (0.28–5.98) |
| Fifth                                                  | 8/18                                | 47      | –                |
| Relationship of the caretaker interviewed to the child |                                     |         |                  |
| Parent                                                 | 51/92                               | 37      | 2.32 (0.28–19.5) |
| Other relationship                                     | 2/4                                 | 58      | 2.32 (0.28–19.5) |
| Does child's mother live in the household              |                                     |         |                  |
| Yes                                                    | 52/94                               | 57      | 3.25 (0.19–56.6) |
| No                                                     | 1/2                                 | 29      | 3.25 (0.19–56.6) |
| Does child's father live in the household              |                                     |         |                  |
| Yes                                                    | 40/76                               | 56      | 0.80 (0.26–2.45) |
| No                                                     | 13/20                               | 61      | 0.80 (0.26–2.45) |
| Caretaker education status                             |                                     |         |                  |
| None                                                   | 19/41                               | 49      | –                |
| Religious only                                         | 16/25                               | 64      | 1.87 (0.61–5.72) |
| Less than primary                                      | 9/14                                | 67      | 2.13 (0.55–8.30) |
| Completed primary, secondary, or post-secondary        | 9/16                                | 55      | 1.30 (0.37–4.55) |

SUPPLEMENTAL TABLE 6

Risk factors for diarrheal illness among children &lt; 5 years old in the Healthcare Utilization and Attitude Survey, Bamako, 2007 (N = 1,000)

| Variable                                                          | Any diarrhea |         | OR (95% CI)      |
|-------------------------------------------------------------------|--------------|---------|------------------|
|                                                                   | n/N          | Percent |                  |
| Child's age group (months)                                        |              |         |                  |
| 0-11                                                              | 44/246       | 18      | 3.05 (1.82-5.11) |
| 12-23                                                             | 56/363       | 15      | 2.56 (1.57-4.18) |
| 24-59                                                             | 26/391       | 7       |                  |
| Age (months)                                                      | -            | -       | 0.96 (0.95-0.97) |
| Child sex                                                         |              |         |                  |
| Male                                                              | 68/492       | 13      | 0.76 (0.51-1.13) |
| Female                                                            | 58/508       | 10      | 0.76 (0.51-1.13) |
| Children < 60 months old living in the household                  | -            | -       | 1.05 (0.96-1.14) |
| Child's household wealth ranking quintiles                        |              |         |                  |
| First to second                                                   | 52/404       | 12      | 0.78 (0.46-1.31) |
| Third                                                             | 29/196       | 15      |                  |
| Fourth to fifth                                                   | 45/400       | 10      | 0.65 (0.38-1.11) |
| Relationship of the caretaker interviewed to the child            |              |         |                  |
| Parent                                                            | 121/926      | 5       | 3.03 (1.1-8.36)  |
| Other relationship                                                | 5/74         | 12      | 3.03 (1.1-8.36)  |
| Does the child's mother live in the household?                    |              |         |                  |
| Yes                                                               | 123/961      | 12      | 2.37 (0.64-8.74) |
| No                                                                | 3/33         | 6       | 2.37 (0.64-8.74) |
| Does the child's father live in the household?                    |              |         |                  |
| Yes                                                               | 97/822       | 11      | 0.81 (0.50-1.32) |
| No                                                                | 29/178       | 14      | 0.81 (0.50-1.32) |
| Caretaker education status                                        |              |         |                  |
| None                                                              | 53/478       | 10      |                  |
| Religious only                                                    | 32/305       | 14      | 1.47 (0.88-2.44) |
| Less than primary                                                 | 21/148       | 15      | 1.51 (0.85-2.71) |
| Completed primary, secondary, or post-secondary                   | 20/169       | 12      | 1.20 (0.67-2.15) |
| Caretaker believes that she knows how to prevent                  |              |         |                  |
| Simple loose/watery diarrhea                                      |              |         |                  |
| Yes                                                               | 63/628       | 9       | 0.51 (0.34-0.77) |
| No                                                                | 63/372       | 16      | 0.51 (0.34-0.77) |
| Bloody diarrhea                                                   |              |         |                  |
| Yes                                                               | 62/560       | 10      | 0.67 (0.45-1.00) |
| No                                                                | 64/440       | 14      | 0.67 (0.45-1.00) |
| Rice/watery cholera-like illness                                  |              |         |                  |
| Yes                                                               | 65/568       | 10      | 0.72 (0.48-1.08) |
| No                                                                | 61/432       | 14      | 0.72 (0.48-1.08) |
| What caretaker thinks are the best ways to prevent diarrhea       |              |         |                  |
| Proper disposal of human waste                                    |              |         |                  |
| Yes                                                               | 35/274       | 11      | 0.94 (0.60-1.47) |
| No                                                                | 91/726       | 12      | 0.94 (0.60-1.47) |
| Nutrition                                                         |              |         |                  |
| Yes                                                               | 44/342       | 12      | 1.03 (0.68-1.58) |
| No                                                                | 82/658       | 12      | 1.03 (0.68-1.58) |
| Breastfeeding                                                     |              |         |                  |
| Yes                                                               | 10/102       | 9       | 0.70 (0.33-1.45) |
| No                                                                | 116/898      | 12      | 0.70 (0.33-1.45) |
| Medication                                                        |              |         |                  |
| Yes                                                               | 18/178       | 10      | 0.75 (0.42-1.32) |
| No                                                                | 108/822      | 12      | 0.75 (0.42-1.32) |
| Vaccines                                                          |              |         |                  |
| Yes                                                               | 9/138        | 5       | 0.35 (0.16-0.75) |
| No                                                                | 117/862      | 13      | 0.35 (0.16-0.75) |
| Washing hands                                                     |              |         |                  |
| Yes                                                               | 29/252       | 10      | 0.81 (0.51-1.31) |
| No                                                                | 97/748       | 12      | 0.81 (0.51-1.31) |
| Clean food or water                                               |              |         |                  |
| Yes                                                               | 43/459       | 9       | 0.55 (0.36-0.84) |
| No                                                                | 83/541       | 15      | 0.55 (0.36-0.84) |
| Caretaker thinks that there is treatment that works best to treat |              |         |                  |
| Simple loose/watery diarrhea                                      |              |         |                  |
| Yes                                                               | 113/931      | 11      | 0.77 (0.23-2.58) |
| No                                                                | 4/21         | 14      | 0.77 (0.23-2.58) |
| Bloody diarrhea                                                   |              |         |                  |
| Yes                                                               | 109/898      | 11      | 0.56 (0.18-1.68) |
| No                                                                | 5/22         | 19      | 0.56 (0.18-1.68) |

(continued)

SUPPLEMENTAL TABLE 6  
Continued

| Variable                                                                                                               | Any diarrhea |         | OR (95% CI)      |
|------------------------------------------------------------------------------------------------------------------------|--------------|---------|------------------|
|                                                                                                                        | <i>n/N</i>   | Percent |                  |
| Rice/watery cholera-like illness                                                                                       |              |         |                  |
| Yes                                                                                                                    | 109/898      | 12      | 0.66 (0.22–1.95) |
| No                                                                                                                     | 5/24         | 17      | 0.66 (0.22–1.95) |
| Caretaker thinks ORS works well to treat diarrhea                                                                      |              |         |                  |
| Yes                                                                                                                    | 117/950      | 12      | 0.26 (0.07–1.02) |
| No                                                                                                                     | 3/12         | 33      | 0.26 (0.07–1.02) |
| Caretaker thinks simple loose/watery diarrhea is more dangerous than bloody and cholera-like diarrhea or does not know |              |         |                  |
| Yes                                                                                                                    | 7/36         | 18      | 1.70 (0.68–4.3)  |
| No                                                                                                                     | 119/964      | 12      | 1.70 (0.68–4.3)  |
| Caretaker thinks vaccines are important to the child                                                                   |              |         |                  |
| Yes                                                                                                                    | 126/1,000    | 12      | –                |
| No                                                                                                                     | 0/0          | –       | –                |

OR = odds ratio; 95% CI = 95% confidence interval; ORS.
